# Supplementary material for: The Involvement of RAGE and Its Ligands during Progression of ALS in SOD1 G93A Transgenic Mice
Source: MDPI journal article supplement (doi:10.3390/ijms23042184), 2022-02-16
Supplement: s1 [file s1]

Supplementary **Table S1**.

Molecular interactions between studied gene – GeneMANIA prediction server (<http://genemania.org>)

| Gene 1        | Gene 2        | Interaction          |
|---------------|---------------|----------------------|
| <i>Nefh</i>   | <i>S100b</i>  | Co-expression        |
| <i>Rac1</i>   | <i>S100a6</i> | Co-expression        |
| <i>Nefh</i>   | <i>S100b</i>  | Co-expression        |
| <i>Prdx5</i>  | <i>Ak2</i>    | Co-expression        |
| <i>Tle1</i>   | <i>S100b</i>  | Co-expression        |
| <i>S100a6</i> | <i>Sod1</i>   | Co-expression        |
| <i>Prdx5</i>  | <i>Ak2</i>    | Co-expression        |
| <i>S100a1</i> | <i>Ager</i>   | Co-expression        |
| <i>Stk38</i>  | <i>Tle1</i>   | Co-expression        |
| <i>Rac1</i>   | <i>S100a6</i> | Co-expression        |
| <i>Hmgb2</i>  | <i>Cacybp</i> | Co-expression        |
| <i>Sod3</i>   | <i>Ager</i>   | Co-expression        |
| <i>Ak2</i>    | <i>Ccs</i>    | Co-expression        |
| <i>S100a6</i> | <i>Ager</i>   | Co-expression        |
| <i>Tle5</i>   | <i>Ager</i>   | Co-expression        |
| <i>Prkcz</i>  | <i>Cd24a</i>  | Co-expression        |
| <i>S100a1</i> | <i>Prdx5</i>  | Co-expression        |
| <i>Prdx5</i>  | <i>Sod1</i>   | Co-expression        |
| <i>S100a1</i> | <i>Tle5</i>   | Co-expression        |
| <i>Nefh</i>   | <i>S100b</i>  | Co-expression        |
| <i>Prdx5</i>  | <i>S100a6</i> | Co-expression        |
| <i>Tle5</i>   | <i>Ager</i>   | Co-expression        |
| <i>Hmgb2</i>  | <i>Cd24a</i>  | Co-expression        |
| <i>Ak2</i>    | <i>Ccs</i>    | Co-expression        |
| <i>P4hb</i>   | <i>Ccs</i>    | Co-expression        |
| <i>P4hb</i>   | <i>Ak2</i>    | Co-expression        |
| <i>Nefh</i>   | <i>S100b</i>  | Co-expression        |
| <i>Tle5</i>   | <i>Sod3</i>   | Co-expression        |
| <i>Nefh</i>   | <i>Ager</i>   | Co-expression        |
| <i>Tle5</i>   | <i>Rac1</i>   | Co-expression        |
| <i>S100a6</i> | <i>Sod1</i>   | Co-expression        |
| <i>Prdx5</i>  | <i>Sod3</i>   | Co-expression        |
| <i>S100a6</i> | <i>Cd24a</i>  | Co-localization      |
| <i>Huwe1</i>  | <i>Rac1</i>   | Co-localization      |
| <i>Nefh</i>   | <i>S100b</i>  | Co-localization      |
| <i>Hmgb2</i>  | <i>Hmgb1</i>  | Co-localization      |
| <i>Stk38</i>  | <i>Cd24a</i>  | Co-localization      |
| <i>Tlr2</i>   | <i>Sod3</i>   | Co-localization      |
| <i>S100a1</i> | <i>S100a6</i> | Co-localization      |
| <i>Stk38</i>  | <i>Rac1</i>   | Co-localization      |
| <i>Als2</i>   | <i>Sod1</i>   | Genetic Interactions |

|                |               |                       |
|----------------|---------------|-----------------------|
| <i>Prkcz</i>   | <i>Cd24a</i>  | Other                 |
| <i>Nefh</i>    | <i>Sod1</i>   | Other                 |
| <i>Cd24a</i>   | <i>Hmgb1</i>  | Physical Interactions |
| <i>Cd24a</i>   | <i>Hmgb1</i>  | Physical Interactions |
| <i>S100a6</i>  | <i>Cacybp</i> | Physical Interactions |
| <i>S100a7a</i> | <i>Ager</i>   | Physical Interactions |
| <i>Ager</i>    | <i>Hmgb1</i>  | Physical Interactions |
| <i>Cacybp</i>  | <i>S100b</i>  | Physical Interactions |
| <i>S100a6</i>  | <i>Cacybp</i> | Physical Interactions |
| <i>Prkcz</i>   | <i>Ager</i>   | Physical Interactions |
| <i>Rac1</i>    | <i>Sod1</i>   | Physical Interactions |
| <i>Tle1</i>    | <i>Hmgb1</i>  | Physical Interactions |
| <i>Prdx5</i>   | <i>Sod1</i>   | Physical Interactions |
| <i>Tlr2</i>    | <i>Hmgb1</i>  | Physical Interactions |
| <i>Tle5</i>    | <i>Hmgb1</i>  | Physical Interactions |
| <i>Huwe1</i>   | <i>Sod1</i>   | Physical Interactions |
| <i>Ccs</i>     | <i>Sod1</i>   | Physical Interactions |
| <i>Cacybp</i>  | <i>S100b</i>  | Physical Interactions |
| <i>S100a6</i>  | <i>Cacybp</i> | Physical Interactions |
| <i>Tle5</i>    | <i>Tle1</i>   | Physical Interactions |
| <i>S100a1</i>  | <i>Cacybp</i> | Physical Interactions |
| <i>Ccs</i>     | <i>Sod1</i>   | Physical Interactions |
| <i>Cacybp</i>  | <i>S100b</i>  | Physical Interactions |
| <i>S100a6</i>  | <i>S100b</i>  | Physical Interactions |
| <i>S100a6</i>  | <i>Cacybp</i> | Physical Interactions |
| <i>Rac1</i>    | <i>Sod1</i>   | Physical Interactions |
| <i>S100a1</i>  | <i>S100b</i>  | Physical Interactions |
| <i>Hmgb2</i>   | <i>Hmgb1</i>  | Physical Interactions |
| <i>Ccs</i>     | <i>Sod1</i>   | Physical Interactions |
| <i>Cacybp</i>  | <i>S100b</i>  | Physical Interactions |
| <i>S100a6</i>  | <i>Cacybp</i> | Physical Interactions |
| <i>Rac1</i>    | <i>Sod1</i>   | Physical Interactions |
| <i>Tlr2</i>    | <i>Hmgb1</i>  | Physical Interactions |
| <i>Ager</i>    | <i>Hmgb1</i>  | Physical Interactions |
| <i>S100a6</i>  | <i>Cacybp</i> | Physical Interactions |
| <i>Tle1</i>    | <i>Hmgb1</i>  | Physical Interactions |
| <i>Tle5</i>    | <i>Hmgb1</i>  | Physical Interactions |
| <i>Cacybp</i>  | <i>S100b</i>  | Physical Interactions |
| <i>S100a6</i>  | <i>Cacybp</i> | Physical Interactions |
| <i>S100a1</i>  | <i>Cacybp</i> | Physical Interactions |
| <i>Tle1</i>    | <i>Hmgb1</i>  | Physical Interactions |
| <i>Tle5</i>    | <i>Hmgb1</i>  | Physical Interactions |
| <i>Ager</i>    | <i>Hmgb1</i>  | Physical Interactions |
| <i>S100a6</i>  | <i>Cacybp</i> | Physical Interactions |
| <i>Tle1</i>    | <i>Hmgb1</i>  | Physical Interactions |

|               |               |                       |
|---------------|---------------|-----------------------|
| <i>Tle5</i>   | <i>Hmgb1</i>  | Physical Interactions |
| <i>Ager</i>   | <i>Hmgb1</i>  | Physical Interactions |
| <i>Cacybp</i> | <i>S100b</i>  | Physical Interactions |
| <i>S100a6</i> | <i>Cacybp</i> | Physical Interactions |
| <i>Prkcz</i>  | <i>Ager</i>   | Physical Interactions |
| <i>Rac1</i>   | <i>Sod1</i>   | Physical Interactions |
| <i>Tle1</i>   | <i>Hmgb1</i>  | Physical Interactions |
| <i>Prdx5</i>  | <i>Sod1</i>   | Physical Interactions |
| <i>Tlr2</i>   | <i>Hmgb1</i>  | Physical Interactions |
| <i>Tle5</i>   | <i>Hmgb1</i>  | Physical Interactions |
| <i>Huwe1</i>  | <i>Sod1</i>   | Physical Interactions |
| <i>S100b</i>  | <i>Ager</i>   | Predicted             |
| <i>Cacybp</i> | <i>Ager</i>   | Predicted             |
| <i>S100a6</i> | <i>Ager</i>   | Predicted             |
| <i>S100a6</i> | <i>Cacybp</i> | Predicted             |
| <i>Ak2</i>    | <i>Sod1</i>   | Predicted             |
| <i>Ak2</i>    | <i>Ccs</i>    | Predicted             |
| <i>Prkcz</i>  | <i>P4hb</i>   | Predicted             |
| <i>Rac1</i>   | <i>S100b</i>  | Predicted             |
| <i>Rac1</i>   | <i>Prkcz</i>  | Predicted             |
| <i>Tlr2</i>   | <i>Prkcz</i>  | Predicted             |
| <i>Tle5</i>   | <i>Tle1</i>   | Predicted             |
| <i>S100a1</i> | <i>Ager</i>   | Predicted             |
| <i>S100a1</i> | <i>S100b</i>  | Predicted             |
| <i>S100a1</i> | <i>Cacybp</i> | Predicted             |
| <i>S100a1</i> | <i>S100a6</i> | Predicted             |
| <i>Hmgb2</i>  | <i>Hmgb1</i>  | Predicted             |
| <i>Stk38</i>  | <i>Ager</i>   | Predicted             |
| <i>Stk38</i>  | <i>Cacybp</i> | Predicted             |
| <i>Stk38</i>  | <i>S100a6</i> | Predicted             |
| <i>Stk38</i>  | <i>S100a1</i> | Predicted             |
| <i>S100b</i>  | <i>Ager</i>   | Predicted             |
| <i>Ccs</i>    | <i>Sod1</i>   | Predicted             |
| <i>Sod3</i>   | <i>Sod1</i>   | Predicted             |
| <i>Sod3</i>   | <i>Ccs</i>    | Predicted             |
| <i>S100a6</i> | <i>S100b</i>  | Predicted             |
| <i>Ak2</i>    | <i>Sod1</i>   | Predicted             |
| <i>Tle5</i>   | <i>Tle1</i>   | Predicted             |
| <i>S100a1</i> | <i>Ager</i>   | Predicted             |
| <i>S100a1</i> | <i>S100b</i>  | Predicted             |
| <i>S100a1</i> | <i>S100a6</i> | Predicted             |
| <i>Hmgb2</i>  | <i>Hmgb1</i>  | Predicted             |
| <i>Stk38</i>  | <i>Prkcz</i>  | Predicted             |
| <i>Ccs</i>    | <i>Sod1</i>   | Predicted             |
| <i>Ak2</i>    | <i>Sod1</i>   | Predicted             |

|               |               |           |
|---------------|---------------|-----------|
| <i>Nefh</i>   | <i>Ccs</i>    | Predicted |
| <i>P4hb</i>   | <i>Sod1</i>   | Predicted |
| <i>Rac1</i>   | <i>Prkcz</i>  | Predicted |
| <i>Ccs</i>    | <i>Sod1</i>   | Predicted |
| <i>S100a6</i> | <i>S100b</i>  | Predicted |
| <i>Ccs</i>    | <i>Sod1</i>   | Predicted |
| <i>S100a6</i> | <i>S100b</i>  | Predicted |
| <i>S100a6</i> | <i>Cacybp</i> | Predicted |
| <i>Prdx5</i>  | <i>Sod1</i>   | Predicted |
| <i>Tle5</i>   | <i>Tle1</i>   | Predicted |
| <i>Huwe1</i>  | <i>Ak2</i>    | Predicted |
| <i>Stk38</i>  | <i>S100b</i>  | Predicted |
| <i>Ccs</i>    | <i>Sod1</i>   | Predicted |
| <i>Cacybp</i> | <i>S100b</i>  | Predicted |
| <i>S100a6</i> | <i>S100b</i>  | Predicted |
| <i>S100a6</i> | <i>Cacybp</i> | Predicted |
| <i>Stk38</i>  | <i>S100b</i>  | Predicted |
| <i>Ager</i>   | <i>Hmgb1</i>  | Predicted |
| <i>S100b</i>  | <i>Ager</i>   | Predicted |
| <i>Ccs</i>    | <i>Sod1</i>   | Predicted |
| <i>Cacybp</i> | <i>S100b</i>  | Predicted |
| <i>S100a6</i> | <i>S100b</i>  | Predicted |
| <i>S100a6</i> | <i>Cacybp</i> | Predicted |
| <i>Ak2</i>    | <i>Sod1</i>   | Predicted |
| <i>Prkcz</i>  | <i>Cd24a</i>  | Predicted |
| <i>Rac1</i>   | <i>Cd24a</i>  | Predicted |
| <i>Rac1</i>   | <i>Prkcz</i>  | Predicted |
| <i>Tle1</i>   | <i>Hmgb1</i>  | Predicted |
| <i>Prdx5</i>  | <i>Sod1</i>   | Predicted |
| <i>Tlr2</i>   | <i>Cd24a</i>  | Predicted |
| <i>Tlr2</i>   | <i>Sod3</i>   | Predicted |
| <i>Tlr2</i>   | <i>Prkcz</i>  | Predicted |
| <i>Tle5</i>   | <i>Hmgb1</i>  | Predicted |
| <i>Tle5</i>   | <i>Rac1</i>   | Predicted |
| <i>Tle5</i>   | <i>Tlr2</i>   | Predicted |
| <i>S100a1</i> | <i>Ager</i>   | Predicted |
| <i>S100a1</i> | <i>S100b</i>  | Predicted |
| <i>S100a1</i> | <i>Sod3</i>   | Predicted |
| <i>S100a1</i> | <i>S100a6</i> | Predicted |
| <i>S100a1</i> | <i>Tlr2</i>   | Predicted |
| <i>Hmgb2</i>  | <i>Hmgb1</i>  | Predicted |
| <i>Stk38</i>  | <i>S100b</i>  | Predicted |
| <i>Nefh</i>   | <i>Sod1</i>   | Predicted |
| <i>Ccs</i>    | <i>Sod1</i>   | Predicted |
| <i>P4hb</i>   | <i>Sod1</i>   | Predicted |

|                |                |                        |
|----------------|----------------|------------------------|
| <i>S100a6</i>  | <i>S100b</i>   | Predicted              |
| <i>Rac1</i>    | <i>Sod1</i>    | Predicted              |
| <i>Rac1</i>    | <i>Als2</i>    | Predicted              |
| <i>Tle5</i>    | <i>Tle1</i>    | Predicted              |
| <i>Ccs</i>     | <i>Sod1</i>    | Predicted              |
| <i>Ccs</i>     | <i>Sod1</i>    | Predicted              |
| <i>Rac1</i>    | <i>Als2</i>    | Predicted              |
| <i>Ccs</i>     | <i>Sod1</i>    | Shared protein domains |
| <i>Sod3</i>    | <i>Sod1</i>    | Shared protein domains |
| <i>Sod3</i>    | <i>Ccs</i>     | Shared protein domains |
| <i>S100a6</i>  | <i>S100b</i>   | Shared protein domains |
| <i>S100a7a</i> | <i>S100b</i>   | Shared protein domains |
| <i>S100a7a</i> | <i>S100a6</i>  | Shared protein domains |
| <i>Prdx5</i>   | <i>P4hb</i>    | Shared protein domains |
| <i>Tle5</i>    | <i>Tle1</i>    | Shared protein domains |
| <i>S100a1</i>  | <i>S100b</i>   | Shared protein domains |
| <i>S100a1</i>  | <i>S100a6</i>  | Shared protein domains |
| <i>S100a1</i>  | <i>S100a7a</i> | Shared protein domains |
| <i>Hmgb2</i>   | <i>Hmgb1</i>   | Shared protein domains |
| <i>Stk38</i>   | <i>Prkcz</i>   | Shared protein domains |
| <i>Ccs</i>     | <i>Sod1</i>    | Shared protein domains |
| <i>Sod3</i>    | <i>Sod1</i>    | Shared protein domains |
| <i>Sod3</i>    | <i>Ccs</i>     | Shared protein domains |
| <i>S100a6</i>  | <i>S100b</i>   | Shared protein domains |
| <i>S100a7a</i> | <i>S100b</i>   | Shared protein domains |
| <i>S100a7a</i> | <i>S100a6</i>  | Shared protein domains |
| <i>Tle5</i>    | <i>Tle1</i>    | Shared protein domains |
| <i>S100a1</i>  | <i>S100b</i>   | Shared protein domains |
| <i>S100a1</i>  | <i>S100a6</i>  | Shared protein domains |
| <i>S100a1</i>  | <i>S100a7a</i> | Shared protein domains |
| <i>Hmgb2</i>   | <i>Hmgb1</i>   | Shared protein domains |
| <i>Stk38</i>   | <i>Prkcz</i>   | Shared protein domains |

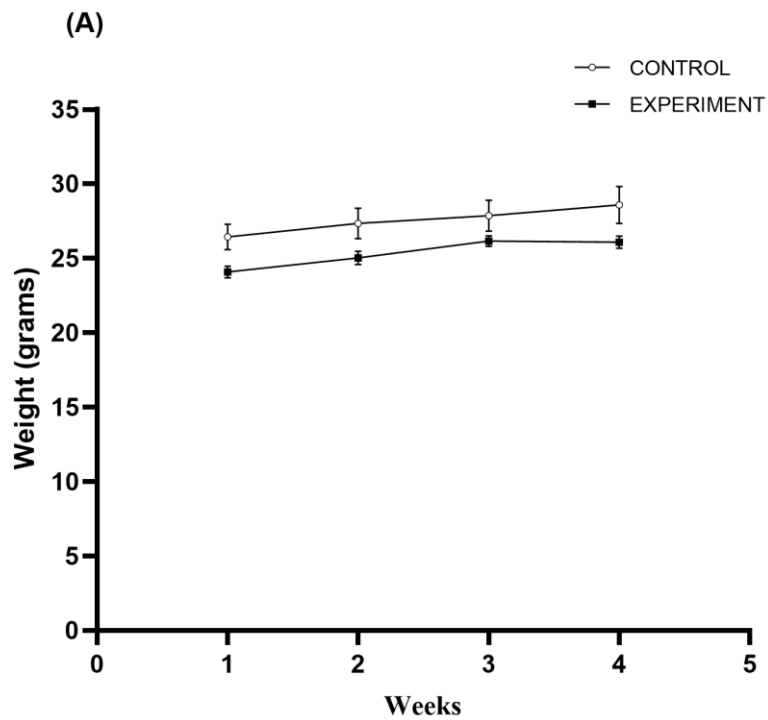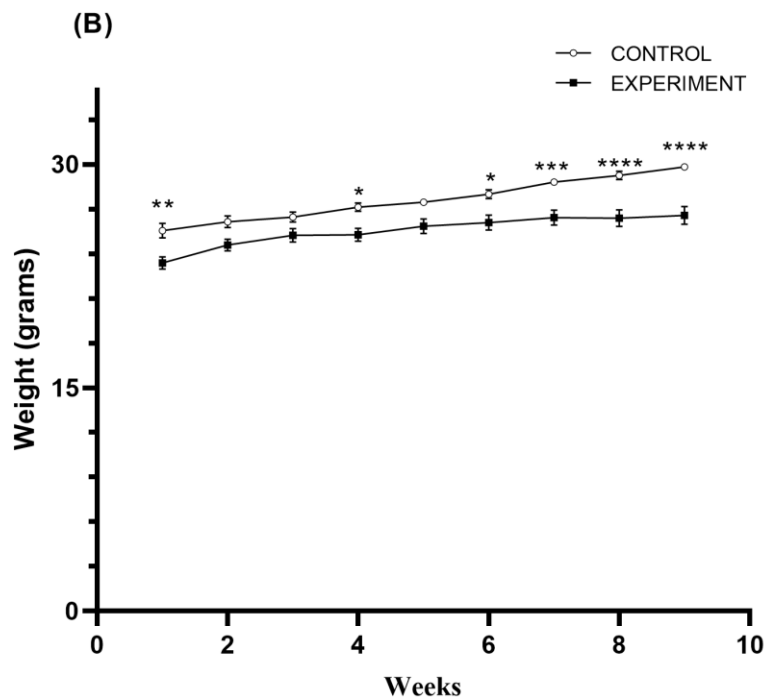

**Figure S1** A-B Body mass changes over the course of the disease between ALS and control mice at 90 time point (A) and 120 time point (B). All mice were weighted three times a week beginning at eight weeks of age. The arithmetic weekly mean was taken from three weekly measurements; n=7 in both groups.
